# Supplementary material for: Facile one-pot synthesis of Mn3O4 nanorods and their analytical application
Source: Royal Society of Chemistry journal article supplement (doi:10.1039/d1nj02513a), 2021-01-01
Supplement: d1nj02513a1.pdf [file d1nj02513a1.pdf]

## Electronic Supplementary Information (ESI)

### Facile one-pot synthesis of $Mn_3O_4$ nanorods and their analytical application

Lijun Xu<sup>a,1</sup>, Lu Yang<sup>b,1</sup>, and Aihua Liu<sup>a,\*</sup>

<sup>a</sup>Institute for Chemical Biology & Biosensing, College of Life Sciences, Qingdao University, 308 Ningxia Road, Qingdao 266071, China

<sup>b</sup>Key Lab of Advanced Technologies of Materials, Ministry of Education, School of Materials Science and Engineering, Southwest Jiaotong University, Chengdu 610031, Sichuan, China

<sup>1</sup>These authors contributed equally to this work.

\*Corresponding author.

E-mail: liuah@qdu.edu.cn (A. Liu)

**Additional Figures and Tables**

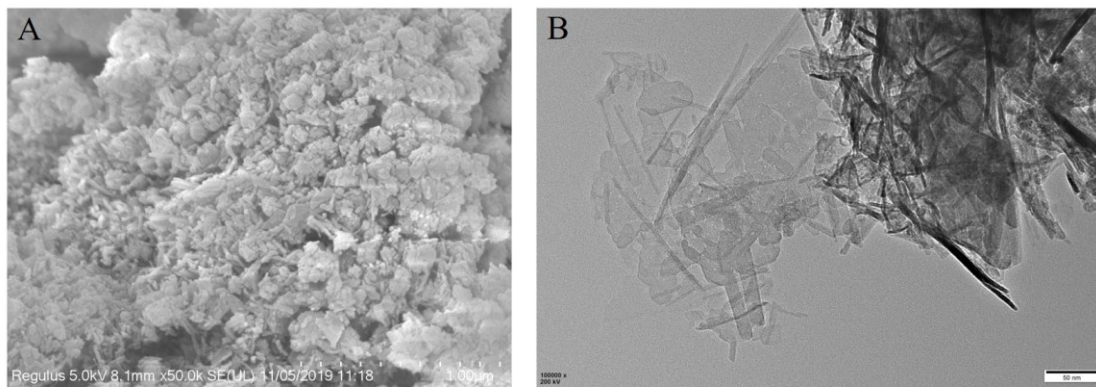

**Fig. S1** The large-scale (A) SEM and (B) TEM images of Mn<sub>3</sub>O<sub>4</sub> nanorods.

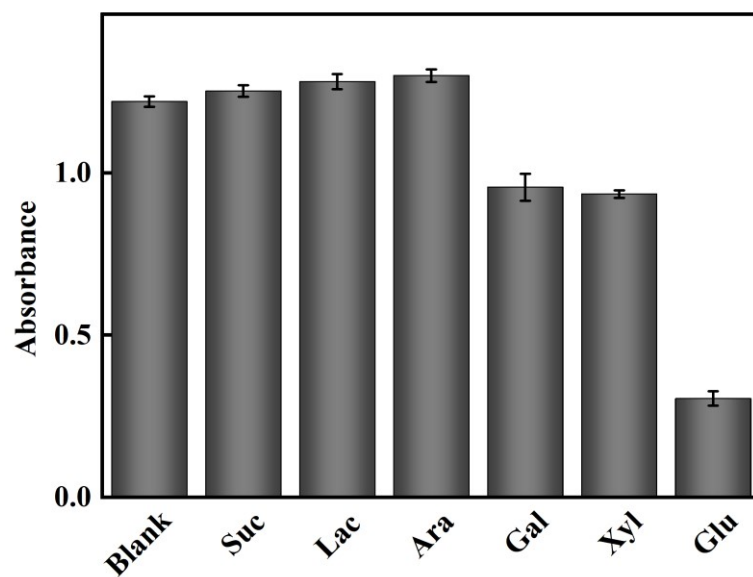

**Fig. S2** Selectivity of the proposed method for glucose detection. The concentration of Suc, Lac, Ara, Gal, Xyl and Glu is 2 mM, respectively. Error bars shown are standard deviations (n=3).

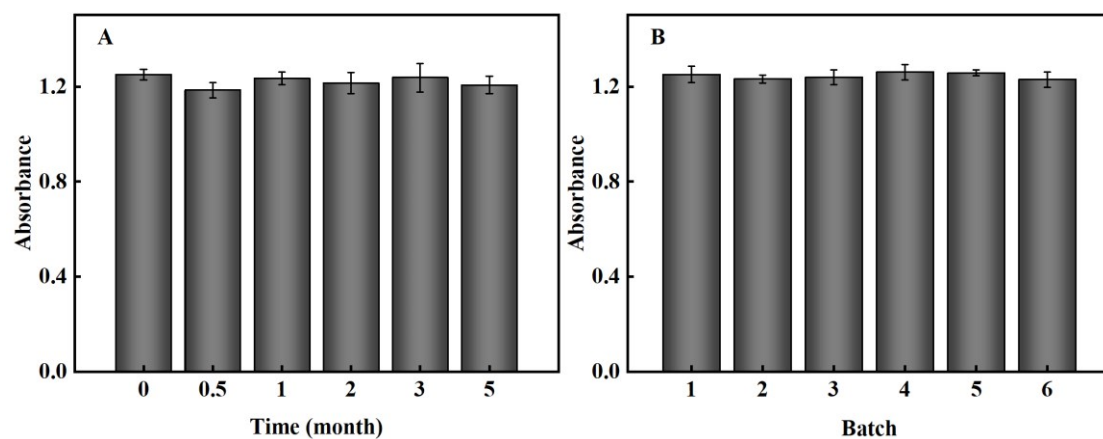

**Fig. S3** (A) The stability of Mn<sub>3</sub>O<sub>4</sub> after storing different time. (B) The activity of Mn<sub>3</sub>O<sub>4</sub> prepared in different batches. Error bars shown are standard deviations (n=3).

**Table S1** Comparison of this method with some others for H<sub>2</sub>O<sub>2</sub> detection.

| Method      | Materials and reagents         | Linear range<br>( $\mu\text{M}$ ) | LOD<br>( $\mu\text{M}$ ) | Ref.      |
|-------------|--------------------------------|-----------------------------------|--------------------------|-----------|
| Colorimetry | Fluorescein                    | 80-1200                           | 30                       | 1         |
| Colorimetry | Acetate                        | 6.0-200                           | 3                        | 2         |
| Colorimetry | Au NPs <sup>a</sup>            | ND <sup>b</sup>                   | 2                        | 3         |
| Colorimetry | MoS <sub>2</sub>               | 5-100                             | 1.5                      | 4         |
| Colorimetry | Co <sub>3</sub> O <sub>4</sub> | 50-25000                          | 10                       | 5         |
| Fluorometry | Cu nanoclusters                | 0.5-10                            | 0.4                      | 6         |
| Fluorometry | CeO <sub>2</sub> -DNA          | 0-1                               | 0.13                     | 7         |
| Colorimetry | Mn <sub>3</sub> O <sub>4</sub> | 2-100                             | 1.7                      | This work |

<sup>a</sup>NPs: nanoparticles. <sup>b</sup>ND: not determined.

**Table S2** Comparison of this method with some others for glucose detection.

| Method             | Materials and reagents<br>(Besides GOx)             | Linear range ( $\mu\text{M}$ ) | LOD ( $\mu\text{M}$ ) | Ref.      |
|--------------------|-----------------------------------------------------|--------------------------------|-----------------------|-----------|
| Colorimetry        | Acetate                                             | 6-150                          | 4                     | 2         |
| Fluorometry        | Cu nanoclusters                                     | 10-100                         | 8                     | 6         |
| Fluorometry        | CeO <sub>2</sub> -DNA                               | 10-200                         | 8.9                   | 7         |
| Colorimetry        | Block copolymer                                     | 300-10000                      | 200                   | 8         |
| Colorimetry        | CoO-OMC <sup>a</sup>                                | 100-5000                       | 68                    | 9         |
| Colorimetry        | HRP <sup>b</sup> -test paper                        | 20-4000                        | 14                    | 10        |
| Colorimetry        | ATP-Fe <sub>3</sub> O <sub>4</sub>                  | 0-4000                         | 50                    | 11        |
| Fluorometry        | Graphene QDs <sup>c</sup>                           | 100-10000                      | 30                    | 12        |
| Colorimetry        | Au@p-SiO <sub>2</sub> <sup>d</sup>                  | 20-500                         | 20                    | 13        |
| Electrochemistry   | GA-bacteria/GDH-<br>bacteria/MWNTs/GCE <sup>e</sup> | 100-2000                       | 40                    | 14        |
| Electrochemistry   | M13-E4@MnO <sub>2</sub> <sup>f</sup>                | 5-2000                         | 1.8                   | 15        |
| GC-MS <sup>g</sup> | BA-MIPs <sup>h</sup>                                | 2.8-168                        | 0.7                   | 16        |
| Colorimetry        | Mn <sub>3</sub> O <sub>4</sub>                      | 5-200                          | 4.4                   | This work |

<sup>a</sup>OMC: ordered-mesoporous carbon. <sup>b</sup>HRP: horseradish peroxidase. <sup>c</sup>QDs: quantum dots. <sup>d</sup>Au@p-SiO<sub>2</sub>: Au nanoparticles encapsulated within porous silica; <sup>e</sup>GA-bacteria/GDH-bacteria/MWNTs/GCE: glucoamylase-displayed bacteria (GA-bacteria) and glucose dehydrogenase-displayed bacteria (GDH-bacteria) were co-immobilized on multi-walled carbon nanotubes (MWNTs) modified glassy carbon electrode (GCE). <sup>f</sup>M13-E4@MnO<sub>2</sub>: genetically engineered M13 phages-templated MnO<sub>2</sub> nanowires. <sup>g</sup>GC-MS: gas chromatograph equipped with a mass spectrometer. <sup>h</sup>BA-MIPs: boronate affinity-molecular imprinted polymers.

**Table S3** Performance of the proposed method for serum samples.

| Sample | Known conc.<br>(mM) | Spiked<br>(mM) | Detected conc.<br>(mM) | RSD (%) |
|--------|---------------------|----------------|------------------------|---------|
| # 1    | 4.65                | 2              | 6.78±0.24              | 3.53    |
| # 2    | 6.96                | 2              | 9.12±0.19              | 2.08    |
| # 3    | 13.13               | 2              | 15.27±0.61             | 3.99    |

## References

1. L. Liu, Y. Shi, Y. F. Yang, M. L. Li, Y. J. Long, Y. M. Huang and H. Z. Zheng, *Chem. Commun.*, 2016, **52**, 13912.
2. Y. Luo, R. Shen, T. Li, C. Xiong, G. Li and L. Ling, *Talanta*, 2019, **196**, 493.
3. F. Wang, X. Liu, C. H. Lu and I. Willner, *ACS Nano*, 2013, **7**, 7278.
4. T. Lin, L. Zhong, L. Guo, F. Fu and G. Chen, *Nanoscale*, 2014, **6**, 11856.
5. J. Mu, Y. Wang, M. Zhao and L. Zhang, *Chem. Commun.*, 2012, **48**, 2540.
6. Y. Ling, N. Zhang, F. Qu, T. Wen, Z. F. Gao, N. B. Li and H. Q. Luo, *Spectrochim. Acta, Part A*, 2014, **118**, 315.
7. B. Liu, Z. Sun, P. J. Huang and J. Liu, *J. Am. Chem. Soc.*, 2015, **137**, 1290.
8. J. Qiao, H. Wu, H. Wei, L. Q. Mao, T. Wang and L. Qi, *Anal. Chem.*, 2020, **92**, 4445.
9. Y. Guo, L. Yan, R. Zhang, H. Ren and A. Liu, *Process Biochem.*, 2019, **81**, 92.
10. X. Wang, F. Li, Z. Cai, K. Liu, J. Li, B. Zhang and J. He, *Anal. Bioanal. Chem.*, 2018, **410**, 2647.
11. N. V. S. Vallabani, A. S. Karakoti and S. Singh, *Colloids Surf. B*, 2017, **153**, 52.
12. L. Zhang, Z. Zhang, R. Liang, Y. Li and J. Qiu, *Anal. Chem.*, 2014, **86**, 4423.
13. A. Samanta, B. B. Dhar and R. N. Devi, *New J. Chem.*, 2012, **36**, 2625.
14. A. Liu, Q. Lang, B. Liang and J. Shi, *Biosens. Bioelectron.*, 2017, **87**, 25.
15. L. Han, C. Shao, B. Liang and A. Liu, *ACS Appl. Mater. Interfaces*, 2016, **8**, 13768.
16. G. Chen, J. Qiu, X. a. Fang, J. Xu, S. Cai, Q. Chen, Y. Liu, F. Zhu and G. Ouyang, *Chem. Asian J.*, 2016, **11**, 2240.
